# Supplementary material
Source: PubMed Central journal article supplement (PMC3183878)
Supplement: hdy201076x1.pdf [file hdy201076x1.pdf]

**Supplementary Table 1. Origins of male individuals for the *SIX9/SIY9* diversity study, the geographic region, and the intron type of the X-linked copy (“long” or “short”, see text).**

| ID | Country | Population          | Geographic region <sup>1</sup> | Intron 2 length |
|----|---------|---------------------|--------------------------------|-----------------|
| 1  | Germany | Bissendorf          | 1                              | short           |
| 2  |         |                     |                                | short           |
| 3  | Sweden  | Oland,              | 1                              | short           |
| 4  |         | Grasgard            |                                | long            |
| 5  | France  | Relais des          | 3                              | Not determined  |
| 6  |         | Chenes              |                                | short           |
| 7  | Greece  | Ioanninon           | 3                              | short           |
| 8  |         |                     |                                | long            |
| 9  | Poland  | Krakow, near        | 2                              | long            |
| 10 |         | Conference Centre   |                                | short           |
| 11 | Denmark | Aarhus Botanic      | 1                              | short           |
| 12 |         | Garden <sup>2</sup> |                                | short           |
| 13 | Austria | Vienna,             | 2                              | short           |
| 14 |         | Heiligenstadt       |                                | short           |

<sup>2</sup> Population of origin unknown.

**Supplementary Table 1, continued**

---

|    |             |                 |   |                |
|----|-------------|-----------------|---|----------------|
| 15 |             |                 |   | short          |
| 16 | Norway      | Lardalsoyri     | 1 | short          |
| 17 |             |                 |   | short          |
| 18 | Greece      | Evrou           | 3 | short          |
| 19 |             | near Tarquinia, |   | Not determined |
| 20 | Italy       | Lazio           | 3 | long           |
| 21 |             |                 |   | long           |
| 22 | Estonia     | Vinupea         | 2 | Not determined |
| 23 |             |                 |   | Not determined |
| 24 | Austria     | Dietmans        | 2 | long           |
| 25 | France      |                 |   | short          |
| 26 | France      | Canche          | 1 | short          |
| 27 |             | Serre de        |   | long           |
| 28 | Portugal    | Nogere          | 4 | long           |
| 29 |             |                 |   | long           |
| 30 | Netherlands | River Kraal     | 1 | long           |
| 31 |             |                 |   | short          |
| 32 | France      | Vitry en Artois | 1 | short          |
| 33 |             | Piedmont,       |   | Not determined |
| 34 | Italy       | Ceres           | 3 | short          |
| 35 |             |                 |   | long           |
| 36 | UK          | Dalkeith        | 1 | long           |

---

---

**Supplementary Table 1, continued**

---

|    |          |                |   |                |
|----|----------|----------------|---|----------------|
| 37 |          | Somerset,      |   | short          |
|    | UK       | Burnham-on-    | 1 | short          |
| 38 |          | Sea            |   |                |
| 41 |          |                |   | short          |
| 42 | Portugal | Segier-Chavez  | 4 | Not determined |
| 43 |          | Madrid, El     |   | long           |
| 44 | Spain    | Escorial       | 4 | long           |
| 45 |          | Ukraine/Belaru |   | Not determined |
| 46 | Ukraine  | s border       | 2 | Not determined |
| 47 |          |                |   | long           |
| 48 | Germany  | near Glaubitz  | 1 | short          |

---

**Supplementary Table 2. *S. dioica* individuals used in this study.**

| Plant ID                       | Location of origin       | Sex    |
|--------------------------------|--------------------------|--------|
| Family 99K24.1, plant 1        | France                   | female |
| Family A2009.1, plant 1        | Finland <sup>3</sup>     | female |
| Family A2009.1, plants 7 and 9 | Finland                  | male   |
| Family A2009.2, plant 1        | Finland                  | female |
| Family 99M24.2 plant           | Unknown                  | male   |
| Family 99M9.1 plant            | Unknown                  | male   |
| FS01- FS09                     | Pentland Hills, Scotland | male   |
| FS10- FS14                     | Pentland Hills, Scotland | female |

<sup>3</sup> Tvärminne Zoological Station, Southern Finland (map reference: N59.844 E23.249)

**Supplementary Table 3. Primers used in this study, and their uses (see also main text).**

| Name                  | Sequence                    | Notes                                         |
|-----------------------|-----------------------------|-----------------------------------------------|
| RB18_F                | CTTGTGGAAGTTCTGGTGGGAAG     | Establishing sex-linkage and deletion mapping |
| RB18_R                | GTCCAATCACATTCAAGTCTCTCC    | of <i>SIY9</i>                                |
| RB18_male_intron_2_F  | TCTTTCACACCCAATTTGATCC      | Amplifying <i>SIY9</i> with RB18_E3_rev       |
| RB18_male_intron_2_R  | GTACAGGGAAGAGCAAAGCAC       | Amplifying <i>SIY9</i>                        |
| RB18_exon_1_F         | AGCTAGCAGTTTTGCAGCATC       |                                               |
| RB18_Y_E3-R           | GACATTCAAGTCTCTCCTCAGCCAA   | Amplifying cDNA to get Y copy                 |
| RB18-Intron2-male-F-2 | AAGGACAACAATTCAATGGGATG     | <i>SIY9</i> -diversity with RB18-3' UTR       |
| RB18-Intron2-male-F-3 | GGGATGGAGGGAGTATGTTATTATTG  |                                               |
| RB18-3' UTR           | GATGAATCTAAAATCAAACAGTGAAAC |                                               |
| RB18_exon_1_F         | AGCTAGCAGTTTTGCAGCATC       | <i>SIX9</i> -diversity                        |

---

**Supplementary Table 3, continued**

|                   |                           |
|-------------------|---------------------------|
| RB18_exon_4_R     | TCTTCAGTCCTTCCTTTGAAGC    |
| RB18-male-exon1-F | ACTCTCTCTCGCTCTTACTCC     |
| RB18_male_exon3-R | GACATTCAAGTCTCTCCTCAGCCAA |
| RB18-E3-R-beg     | TCCTCAGCCAGTCTCTTTGAA     |
| RB18-E2-F-beg     | GTTGCTGCAGTGAACCCTCT      |
| RB18-EXON2-R-Male | TGCCTCAGAGGGTTTACTGC      |

---

**Supplementary Table 4.** Categories of the 94 variants found in the *S. latifolia* *SLX9* sequences. Variants in the two intron 2 types, long (L) and short (S) and listed separately. There were no sites where all S sequences differ from those in *S. dioica*.

| Category of variants                                                                 | Total numbers of polymorphic sites | Numbers of sites in categories |                             |                                       |
|--------------------------------------------------------------------------------------|------------------------------------|--------------------------------|-----------------------------|---------------------------------------|
|                                                                                      |                                    | Variants in L intron 2 type    | Variants in S intron 2 type | Variants shared by L and S haplotypes |
| I. Most sequences same as <i>S. dioica</i> state <sup>4</sup>                        | 69                                 |                                |                             |                                       |
| Variants exclusive to <i>S. latifolia</i>                                            | 55 (36)                            | 15 + 4                         | 18 + 6                      | 3 + 9                                 |
| Shared polymorphisms with <i>S. dioica</i>                                           | 14                                 | 0                              | 9 + 0                       | 2 + 3                                 |
| II. All L sequences entirely or largely different from <i>S. dioica</i> <sup>5</sup> | 25                                 |                                |                             |                                       |
| Fixed difference between L and S sequences                                           | 3 + 1                              | 0                              | 0                           | —                                     |
| Polymorphisms exclusive to S sequences                                               | 12                                 | —                              | 12 <sup>6</sup>             | —                                     |
| Polymorphisms exclusive to L sequences                                               | 1                                  | 1                              | —                           | —                                     |
| Polymorphisms in S sequences shared with <i>S. dioica</i>                            | 8                                  | 0                              | 8                           | 0                                     |
| All S sequences different from <i>S. dioica</i>                                      | 0                                  | —                              | —                           | —                                     |

<sup>4</sup> Excluding an intron 2 region that is present only in the S sequence type within *S. latifolia* (and also in *S. dioica*). The 17 polymorphic sites in this region are included in category II. After position 2024 we have sequences for only two *S. dioica* individuals, limiting the ability to find polymorphisms shared in both species; for category I sites, the values shown are the numbers before and after this point.

<sup>5</sup> In this category, sequences with the S intron 2 type all, or almost all, have the same state as *S. dioica*. Includes the intron 2 region present only in the S sequence type (see footnote 1).

<sup>6</sup> 9 of these are in regions present only in the S sequence type. At the 3 polymorphic sites present in both the L and S sequences, 2 polymorphisms in the S sequences are for the state found in the L sequences.

**Supplementary Table 5. Sites with significant linkage disequilibrium in the *S.***

***latifolia* SLX9 diversity sample.**

| Position 1 (bp) | Position 2 (bp) | Distance (bp) |
|-----------------|-----------------|---------------|
| 734             | 2268            | 602           |
| 794             | 875             | 69            |
| 2057            | 2138            | 79            |
| 2057            | 2141            | 82            |
| 2108            | 2114            | 6             |
| 2126            | 2138            | 12            |
| 2126            | 2141            | 15            |
| 2138            | 2141            | 3             |
| 2195            | 2198            | 3             |



## Supplementary Figures

### **Figure S1. PCR products of *SIX9* in family H2005-1, showing the segregation of the informative intron size variants in the family H2005-1 (see Methods).**

The female parent carries only one variant (480 bp, *SIX9*). The father carries two differently sized variants, (a long Y-linked genomic DNA fragment, of ~ 1200 bp, inherited by all male offspring, and one of intermediate size, 600 bp, which segregates as X-linked; all female offspring inherited the maternal 480 bp band, plus the paternal 600 bp one).

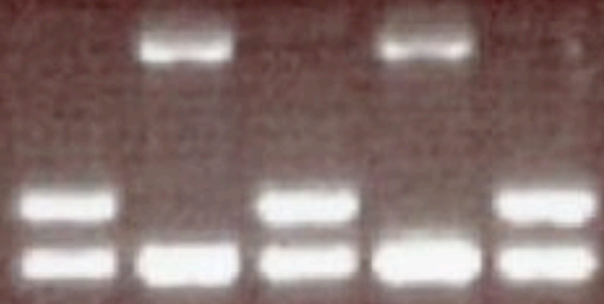

female

male

female

male

female

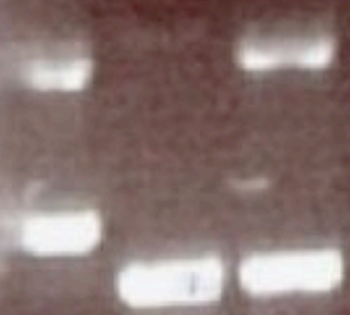

male

female

male

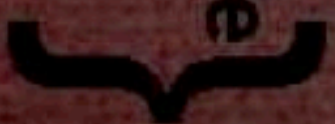

parents

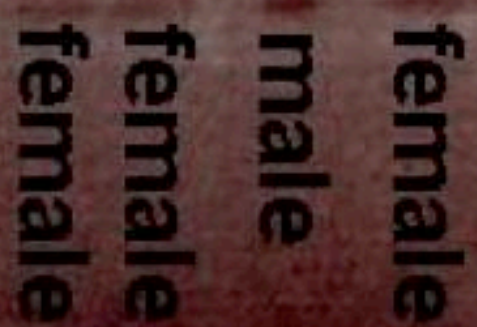

female

male

female

female

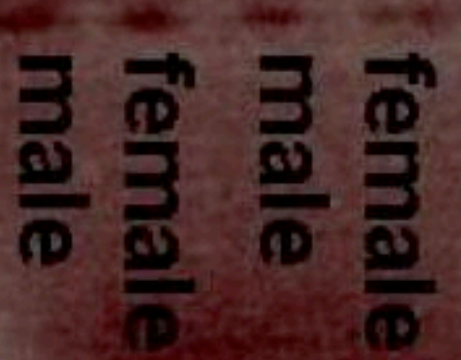

female

male

female

male

**Supplementary Figure 2. Polymorphisms in the SIX9 and SIY9 sequences.**

See Excel file.
